# Supplementary material for: Evolution of Chloroplast J Proteins
Source: PLOS journal article supplement (doi:10.1371/journal.pone.0070384), 2013-07-23
Supplement: S2 (10.1371/journal.pone.0070384.s002) [file journal.pone.0070384.s002]

|              |                                                                                                                              |        |
|--------------|------------------------------------------------------------------------------------------------------------------------------|--------|
| rice         | : MTPAAVAPAPYPTTQGNPSGTLPLAAACMGNTNLEGLGASSSDHAAGPPPSR-RAFLARRHAAASSRSRPPPPASPAAPWNPFGGGGGGGTASQDGGIGGIAPGVVAGAGSGGGVAGG     | : 125  |
| Brachypodium | : ----MTSPHPFAPAPLPHGCGAATPLTPDSVA-PPHAPLAKKRHAATSSRSRAQSPAPFNNPFGGGTGGQNNWGLSNGVSGS-----RNGVKAIVRS                          | : 108  |
| Setaria      | : ----MPPAVADDFPRQNFSGPELAAAHMANPGLGLAPPAGPSPAGAPP-PSRAAPLAKKRHPAPSSRSRAQSPAPFNNPFGGGTGGQNNWGLSNGVSGS-----GGGAGNGIGGGVAGG    | : 116  |
| maize        | : ----MPPAVADDFPRQNFSGPELAAAHMANPGLGLAPPAGPSPAGAPP-SSRAAPLAKKRHPAPSSRSRAQSPAPFNNPFGGGTGGQNNWGLSNGVSGS-----GGG-TDRITGGVAGG    | : 74   |
| sorghum      | : ----MPPAVGPASPRQNPFGAELPAAACMANPGLGLAPPAGPSPAGAPP-PSRAAPLAKKRHPAPSSRSRAQSPAPFNNPFGGGTGGQNNWGLSNGVSGS-----GGGPGDGGVAGG      | : 102  |
| Arabidopsis  | : ----MTSPHPFAPAPLPHGCGAATPLTPDSVA-PPHAPLAKKRHAATSSRSRAQSPAPFNNPFGGGTGGQNNWGLSNGVSGS-----RNGVKAIVRS                          | : -    |
| rice         | : AASATSQOFPVASSNG--EAPFVFGSVRSLPRFGGMAASAKLPEKMGNNOTRGESSVNA----NKRGRSSIFGVDLPGLVLSSENVNIPERLTOLNLC---TRNPLOG---DNPVKTFFVGG | : 240  |
| Brachypodium | : NVSNFALSRRTASSCGDYTTSSVHYTEANAMCKLAUVSTIGNEAL-----VRIHSEATTVPTPTVFMSSGCAASTDVAASSSKNASAVANGTDDTIALKEPITPLINISGGPFOSENG     | : 229  |
| Setaria      | : NGSFASGNTAAAGCHHYAPISVOADNAMPKSTOFNIGDQAPSRGRGHEHNGCPATATFGSTATITLSTNVAALRNMSAVNGLLDGGVLCZALIRMGSDILDDMSAGGNO              | : 239  |
| maize        | : SVSQQPLPEAVSVASPTTAPFVFGSVRSLPRFGGMAASAKLPEKMGNNOTRGESSVNA----NKRGRSSIFGVDLPGLVLSSENVNIPERLTOLNLC---TRNPLOG---DNPVKTFFVGG  | : 201  |
| sorghum      | : SVSQQPLPEAVSVASPTTAPFVFGSVRSLPRFGGMAASAKLPEKMGNNOTRGESSVNA----NKRGRSSIFGVDLPGLVLSSENVNIPERLTOLNLC---TRNPLOG---DNPVKTFFVGG  | : 229  |
| Arabidopsis  | : ----MTSPHPFAPAPLPHGCGAATPLTPDSVA-PPHAPLAKKRHAATSSRSRAQSPAPFNNPFGGGTGGQNNWGLSNGVSGS-----RNGVKAIVRS                          | : -    |
| rice         | : NGSFSSGTSTSDVHRKSYASANANGVAELTQYIGNQAPLGRMG-----TESTDAPPVVVEGGNVSSEAPRTNDVSSGANTNPSTFNVTDTGTGLCFKETS-----                  | : 341  |
| Brachypodium | : NVSNFALSRRTASSCGDYTTSSVHYTEANAMCKLAUVSTIGNEAL-----VRIHSEATTVPTPTVFMSSGCAASTDVAASSSKNASAVANGTDDTIALKEPITPLINISGGPFOSENG     | : 346  |
| Setaria      | : NGSFASGNTAAAGCHHYAPISVOADNAMPKSTOFNIGDQAPSRGRGHEHNGCPATATFGSTATITLSTNVAALRNMSAVNGLLDGGVLCZALIRMGSDILDDMSAGGNO              | : 346  |
| maize        | : NGSFASGNTAAAGCHHYAPISVOADNAMPKSTOFNIGDQAPSRGRGHEHNGCPATATFGSTATITLSTNVAALRNMSAVNGLLDGGVLCZALIRMGSDILDDMSAGGNO              | : 346  |
| sorghum      | : NGSFASGNTAAAGCHHYAPISVOADNAMPKSTOFNIGDQAPSRGRGHEHNGCPATATFGSTATITLSTNVAALRNMSAVNGLLDGGVLCZALIRMGSDILDDMSAGGNO              | : 346  |
| Arabidopsis  | : ----MTSPHPFAPAPLPHGCGAATPLTPDSVA-PPHAPLAKKRHAATSSRSRAQSPAPFNNPFGGGTGGQNNWGLSNGVSGS-----RNGVKAIVRS                          | : 71   |
| rice         | : ----DTPFOKSGGGSRQAEAFVSGSINSEGSVSSAMNSAFVPPSSVNNPFPDPSCLNIGGGVTQCKQSNISGYPSEAFVGG-----SDALSSHSKKVMDRGNVTGANKAF             | : 452  |
| Brachypodium | : ----GDSHQTEPFGGGPRAAAGVYGNSSGNSKDGKDPSTPANNASTSANVATSPPSTYNLNVRGVRHMKMTDANCLPETFTVFGNGSSSASEQSAFVVDGGNFPVSGPSIDR           | : 467  |
| Setaria      | : PEVFTFGSGRAGPAGPFGKHAASSSDRSSEFFSANSNASSNSIFLSTANNAASADSPBKSTLISARGGVMSSQSMESGANCPPEALPG-RNGRSGVSSASAMDDGGNVTNDAN----      | : 488  |
| maize        | : PKVFTFGSGRAGPAGPFGKHAASSSDRSSEFFSANSNASSNSIFLSTANNAASADSPBKSTLISARGGVMSSQSMESGANCPPEALPG-RNGRSGVSSASAMDDGGNVTNDAN----      | : 452  |
| sorghum      | : PKVFTFGSGRAGPAGPFGKHAASSSDRSSEFFSANSNASSNSIFLSTANNAASADSPBKSTLISARGGVMSSQSMESGANCPPEALPG-RNGRSGVSSASAMDDGGNVTNDAN----      | : 480  |
| Arabidopsis  | : ----PFHFRSGSGDPPSIFIGGRSNEGFVGGSGSHVRLQDEKIGIRVMEERAKIESEGKASRIFFPCHNLNSSFSGVYKGNNSVFAVEITPLLSNKLIDSSSRBT                  | : 183  |
| rice         | : TSVHGNMES--TTPARMKMLLHGAILSNNNKQDTHOPPEVSGGTAALFSSAAASMPFTSIQTNVSFELKNGGNLANEDIGNITHSRSDNDQYGPSPFVSSGSNAVPPSEGYAEHALQE     | : 577  |
| Brachypodium | : TSDQGSMS--SHIDPMKMLIYRILSKSKMDAASLOPPTFVRSASDSSSFAAAPP--SFTNFOTNASSSETKDSGNLADDIRKSTYAKSNNSNGVYRISNVFVFGSGSATAASEGAEHTPHD  | : 590  |
| Setaria      | : TSDQGSMS--SHIDPMKMLIYRILSKSKMDAASLOPPTFVRSASDSSSFAAAPP--SFTNFOTNASSSETKDSGNLADDIRKSTYAKSNNSNGVYRISNVFVFGSGSATAASEGAEHTPHD  | : 604  |
| maize        | : TSDQGSMS--SHIDPMKMLIYRILSKSKMDAASLOPPTFVRSASDSSSFAAAPP--SFTNFOTNASSSETKDSGNLADDIRKSTYAKSNNSNGVYRISNVFVFGSGSATAASEGAEHTPHD  | : 510  |
| sorghum      | : TSDQGSMS--SHIDPMKMLIYRILSKSKMDAASLOPPTFVRSASDSSSFAAAPP--SFTNFOTNASSSETKDSGNLADDIRKSTYAKSNNSNGVYRISNVFVFGSGSATAASEGAEHTPHD  | : 537  |
| Arabidopsis  | : G-----HVIDSSKMLISERGTDOKONNVKVKVMDLVGKILSODLSKRLSIVG-----                                                                  | : 234  |
| rice         | : DIKKLININREGA--SVGSKVNGSSQSVRSKAEIPVFGATOPNPESRAFSHSIHSSSESTSGNDMSSEKTIINTASDTIGES--CAVRJEPAWCSRESLFGILVYKSAVRDKK-BAHNAR   | : 699  |
| Brachypodium | : INKLININMEGFS--VCIOVNASIPDSQCHAEIMFGCTVIRPKVQSCPTIRLHSHISTFTEPVSSSSSLNPMADAGKEHAGES--GAUKODLGRSRESLFGILVYKSAVRDKK-BAHNAR   | : 712  |
| Setaria      | : EIKKLININREGPFLGCTKLINSAAPGLTQSKADSTGCGAVIR-PROKSHFHLANLSCSSFSSTFTEPVSSSGTMAEGETHADD--CVVKDGLGSRRETLTGLDLSIKSAVRDKK-VYHSKR | : 727  |
| maize        | : -----SKENITPTPEQFQSTGTGSGYCAVITQVQSYPTILANCTFSTFTEPVSSSGTMAEGETHADD--CVVKDGLGSRRETLTGLDLSIKSAVRDKK-BAHNAR                  | : 620  |
| sorghum      | : -----SKENITPTPEQFQSTGTGSGYCAVITQVQSYPTILANCTFSTFTEPVSSSGTMAEGETHADD--CVVKDGLGSRRETLTGLDLSIKSAVRDKK-BAHNAR                  | : 645  |
| Arabidopsis  | : -----SMITLGNHSGDSGVSNEKKVHDFNSSCPNTSFVGLPSPQNLNARNVHVSSTVNTSDTFVFNQDSVKTGMFETFPNSKVNFSLDGLGIFNARISVGATTAR                  | : 345  |
| rice         | : KKKRTRRLKHOAQCPHFHFACTTTGCPMDLACDPSMDGSPSPATVYCAKAAAGVSSGSHHLYGVSQSSCAAE-LVSAEHLVHDADPTCEDEGRHINTTANSEASSESSDEEVTIP        | : 825  |
| Brachypodium | : KKKRTRRLKHOAQCPHFHFACTTTGCPMDLACDPSMDGSPSPATVYCAKAAAGVSSGSHHLYGVSQSSCAAE-LVSAEHLVHDADPTCEDEGRHINTTANSEASSESSDEEVTIP        | : 838  |
| Setaria      | : KKKRTRRLKHOAQCPHFHFACTTTGCPMDLACDPSMDGSPSPATVYCAKAAAGVSSGSHHLYGVSQSSCAAE-LVSAEHLVHDADPTCEDEGRHINTTANSEASSESSDEEVTIP        | : 848  |
| maize        | : KKKRTRRLKHOAQCPHFHFACTTTGCPMDLACDPSMDGSPSPATVYCAKAAAGVSSGSHHLYGVSQSSCAAE-LVSAEHLVHDADPTCEDEGRHINTTANSEASSESSDEEVTIP        | : 745  |
| sorghum      | : KKKRTRRLKHOAQCPHFHFACTTTGCPMDLACDPSMDGSPSPATVYCAKAAAGVSSGSHHLYGVSQSSCAAE-LVSAEHLVHDADPTCEDEGRHINTTANSEASSESSDEEVTIP        | : 770  |
| Arabidopsis  | : KGGGPOPVKVNIGREFAFAPSAIPNGSNEAPEALSPMDTSPPEVTEVCREFSATTPPTAPNVLDAEVAATERMEINSGDEVNNYQAEFNTGNCAEDHEDLAGDSISGAETSEPKAAEMETSS | : 472  |
| rice         | : IAPFSSSNHDTANCKPKSPAPEVWDADYRIANQOQAYEACHTAETICEHATFESSPESGHAETFASTSSSSSVSTIRNRKKRRTKSKQLPSPVTOQAYVQKSSDTHVQSPETK          | : 952  |
| Brachypodium | : NASPSPNNINWGADEPKMCTTEAWFDGYCENKVGKTCEDTSKLRSSEHPLANLSCSSFSSTFTEPVSSSGTMAEGETHADD--CVVKDGLGSRRETLTGLDLSIKSAVRDKK-VYHSKR    | : 965  |
| Setaria      | : NASPSPNNINWGADEPKMCTTEAWFDGYCENKVGKTCEDTSKLRSSEHPLANLSCSSFSSTFTEPVSSSGTMAEGETHADD--CVVKDGLGSRRETLTGLDLSIKSAVRDKK-VYHSKR    | : 975  |
| maize        | : NASPSPNNINWGADEPKMCTTEAWFDGYCENKVGKTCEDTSKLRSSEHPLANLSCSSFSSTFTEPVSSSGTMAEGETHADD--CVVKDGLGSRRETLTGLDLSIKSAVRDKK-VYHSKR    | : 847  |
| sorghum      | : NASPSPNNINWGADEPKMCTTEAWFDGYCENKVGKTCEDTSKLRSSEHPLANLSCSSFSSTFTEPVSSSGTMAEGETHADD--CVVKDGLGSRRETLTGLDLSIKSAVRDKK-VYHSKR    | : 872  |
| Arabidopsis  | : ETTFATASEE-----VTSRSPORKENDHLSNDAASSSTFSGASSSGVGLPLTSKRNIRKKNPTKLGQDYVILINPATIKSSSHPLTGVGSHFT                              | : 570  |
| rice         | : ACDS-----ADQSGRGASTSALECECTWRISGNMAYANGHATAEDVYTGINSVSGHDSYGCRRALMCLYSNRAATRMGLQMSALODCHTASIDPFLKAYVRAACGL                 | : 1063 |
| Brachypodium | : TEHS-----SKE-----LSAHECECTWRISGNMAYANGHATAEDVYTGINSVSGHDSYGCRRALMCLYSNRAATRMGLQMSALODCHTASIDPFLKAYVRAACGL                  | : 1069 |
| Setaria      | : NEDS-----LKEQATGDSSTSALECECTWRISGNMAYANGHATAEDVYTGINSVSGHDSYGCRRALMCLYSNRAATRMGLQMSALODCHTASIDPFLKAYVRAACGL                | : 1086 |
| maize        | : NEDS-----VKAQCRDSSSTSALECECTWRISGNMAYANGHATAEDVYTGINSVSGHDSYGCRRALMCLYSNRAATRMGLQMSALODCHTASIDPFLKAYVRAACGL                | : 958  |
| sorghum      | : NODS-----VKEQFRDSSSTSALECECTWRISGNMAYANGHATAEDVYTGINSVSGHDSYGCRRALMCLYSNRAATRMGLQMSALODCHTASIDPFLKAYVRAACGL                | : 983  |
| Arabidopsis  | : GKPSERDPLTRLHFKPINNSVMEKRIEKDVNNAEACCEKRLRLGNMAYKGLDSRAESSVYTGIDSVPRIESRNCRRALMCLYSNRAATRMGLQMSALODCHTASIDPFLKAYVRAACGL    | : 697  |
| rice         | : ALGLEDASRYVKKILGSSSDICVPRKIVCAESGLOKACVSECPHAGRRRLTDLTDALELIDSLITSTYSEKLTWRKSHALLIRKYEVLILCEQTVLACKNSPPD-----SH            | : 1179 |
| Brachypodium | : ALGLEDASRYVKKILGSSSDICVPRKIVCAESGLOKACVSECPHAGRRRLTDLTDALELIDSLITSTYSEKLTWRKSHALLIRKYEVLILCEQTVLACKNSPPD-----SH            | : 1196 |
| Setaria      | : ALGLEDASRYVKKILGSSSDICVPRKIVCAESGLOKACVSECPHAGRRRLTDLTDALELIDSLITSTYSEKLTWRKSHALLIRKYEVLILCEQTVLACKNSPPD-----SH            | : 1212 |
| maize        | : ALGLEDASRYVKKILGSSSDICVPRKIVCAESGLOKACVSECPHAGRRRLTDLTDALELIDSLITSTYSEKLTWRKSHALLIRKYEVLILCEQTVLACKNSPPD-----SH            | : 1084 |
| sorghum      | : ALGLEDASRYVKKILGSSSDICVPRKIVCAESGLOKACVSECPHAGRRRLTDLTDALELIDSLITSTYSEKLTWRKSHALLIRKYEVLILCEQTVLACKNSPPD-----SH            | : 1109 |
| Arabidopsis  | : ALGLEDASRYVKKILGSSSDICVPRKIVCAESGLOKACVSECPHAGRRRLTDLTDALELIDSLITSTYSEKLTWRKSHALLIRKYEVLILCEQTVLACKNSPPD-----SH            | : 815  |
| rice         | : -TTTTSGHLPDILIKKYLHCKPDALELHKKHQTIVKSGRSGSCFSSSLITRELLHKKAGNNAFWRKRSVAVDYSAAALANSSRPFSVAVFCNRAAYQALGOVTDATDCSL             | : 1305 |
| Brachypodium | : SKKAPGCSLAPFLIKKYLHCKPDALELHKKHQTIVKSGRSGSCFSSSLITRELLHKKAGNNAFWRKRSVAVDYSAAALANSSRPFSVAVFCNRAAYQALGOVTDATDCSL             | : 1323 |
| Setaria      | : SKKAPGCSLAPFLIKKYLHCKPDALELHKKHQTIVKSGRSGSCFSSSLITRELLHKKAGNNAFWRKRSVAVDYSAAALANSSRPFSVAVFCNRAAYQALGOVTDATDCSL             | : 1339 |
| maize        | : SKKAPGCSLAPFLIKKYLHCKPDALELHKKHQTIVKSGRSGSCFSSSLITRELLHKKAGNNAFWRKRSVAVDYSAAALANSSRPFSVAVFCNRAAYQALGOVTDATDCSL             | : 1211 |
| sorghum      | : SKKAPGCSLAPFLIKKYLHCKPDALELHKKHQTIVKSGRSGSCFSSSLITRELLHKKAGNNAFWRKRSVAVDYSAAALANSSRPFSVAVFCNRAAYQALGOVTDATDCSL             | : 1236 |
| Arabidopsis  | : DTPKDNFTHQCHMFKSSYKKEPDAIASLKKCOLLSATKRENGKTLSSPTLAATIRELLHKKAGNNAFWRKRSVAVDYSAAALANSSRPFSVAVFCNRAAYQALGOVTDATDCSL         | : 942  |
| rice         | : AMVLDTNYKAISRRTATFVMIRDYQAAANDVKKILLELKKVNV-----GVSYPKAFKHKDLQKHAHRLSSIDEAKNTPLNLYLILGVSESSPDIKKAYRKAALRHHPDKAQCILLRNEADE  | : 1429 |
| Brachypodium | : AMVLDTNYKAISRRTATFVMIRDYQAAANDVKKILLELKKVNV-----GVSYPKAFKHKDLQKHAHRLSSIDEAKNTPLNLYLILGVSESSPDIKKAYRKAALRHHPDKAQCILLRNEADE  | : 1447 |
| Setaria      | : AMVLDTNYKAISRRTATFVMIRDYQAAANDVKKILLELKKVNV-----GVSYPKAFKHKDLQKHAHRLSSIDEAKNTPLNLYLILGVSESSPDIKKAYRKAALRHHPDKAQCILLRNEADE  | : 1463 |
| maize        | : AMVLDTNYKAISRRTATFVMIRDYQAAANDVKKILLELKKVNV-----GVSYPKAFKHKDLQKHAHRLSSIDEAKNTPLNLYLILGVSESSPDIKKAYRKAALRHHPDKAQCILLRNEADE  | : 1335 |
| sorghum      | : AMVLDTNYKAISRRTATFVMIRDYQAAANDVKKILLELKKVNV-----GVSYPKAFKHKDLQKHAHRLSSIDEAKNTPLNLYLILGVSESSPDIKKAYRKAALRHHPDKAQCILLRNEADE  | : 1360 |
| Arabidopsis  | : AMVLDTNYKAISRRTATFVMIRDYQAAANDVKKILLELKKVNV-----GVSYPKAFKHKDLQKHAHRLSSIDEAKNTPLNLYLILGVSESSPDIKKAYRKAALRHHPDKAQCILLRNEADE  | : 1068 |

# HPD

|              |                                                                                           |        |
|--------------|-------------------------------------------------------------------------------------------|--------|
| rice         | : GWRVWKEVWADADHLPKFTIGAYNVLSDGKREEVNEDDLNARNVSSRSMHRSFPONYNNGRGNPRQWSSRSGSRWSGDDDYW----- | : 1526 |
| Brachypodium | : GWRVWKEVWADADHLPKFTIGAYNVLSDGKREEVNEDDLNARNVSSRSMHRSFPONYNNGRGNPRQWSSRSGSRWSGDDDYW----- | : 1546 |
| Setaria      | : GWRVWKEVWADADHLPKFTIGAYNVLSDGKREEVNEDDLNARNVSSRSMHRSFPONYNNGRGNPRQWSSRSGSRWSGDDDYW----- | : 1555 |
| maize        | : GWRVWKEVWADADHLPKFTIGAYNVLSDGKREEVNEDDLNARNVSSRSMHRSFPONYNNGRGNPRQWSSRSGSRWSGDDDYW----- | : 1427 |
| sorghum      | : GWRVWKEVWADADHLPKFTIGAYNVLSDGKREEVNEDDLNARNVSSRSMHRSFPONYNNGRGNPRQWSSRSGSRWSGDDDYW----- | : 1453 |
| Arabidopsis  | : RHWKEHGFVWKEHLPKFTIGAYNVLSDGKREEVNEDDLNARNVSSRSMHRSFPONYNNGRGNPRQWSSRSGSRWSGDDDYW-----  | : 1165 |

**Figure S2. Sequence alignment of DJC31 homologs from Arabidopsis (DJC31), *Brachypodium distachyon* (Bradi2g27160), millet (*Setaria italica*, SiPROV000210m), maize (GRMZM2G348697), sorghum (Sb09g018680), and the re-annotated rice DJC31 homolog, OsDJC31.**

OsDJC31 (GenBank accession: BK008486) was re-annotated from the continuous genomic region covered by loci LOC\_Os05g31056 and LOC\_Os05g31062. The J domain is underlined in blue. The position of the HPD tripeptide is indicated.
